# Supplementary material for: Unraveling the role of internal–external metal substitution in Zn3[Co(CN6)]2 for the styrene oxide–CO2 cycloaddition reaction
Source: Royal Society of Chemistry journal article supplement (doi:10.1039/d3dt04261h), 2024-01-01
Supplement: d3dt04261h1.pdf [file d3dt04261h1.pdf]

# Unraveling the Role of Internal-External Metal Substitution in $\text{Zn}_3[\text{Co}(\text{CN}_6)]_2$ for Styrene Oxide- $\text{CO}_2$ Cycloaddition Reaction.

Erik J. Del Angel-Gómez <sup>a</sup>, Omar Reséndiz-Hernández <sup>a</sup>, Jesús Vega-Moreno <sup>b</sup>, Oscar Morelos-Santos <sup>c</sup>, Adela Lemus-Santana <sup>a\*</sup> and Benjamín Portales-Martínez <sup>a\*</sup>.

<sup>a</sup> Instituto Politécnico Nacional. CICATA Legaria, Col. Irrigación, México City, 11500, México

<sup>b</sup> CONAHCYT- Instituto Politécnico Nacional. CICATA Legaria, Col. Irrigación, México City, 11500, México

<sup>c</sup> Tecnológico Nacional de México/ Instituto Tecnológico de Ciudad Madero, Ciencias Básicas, Col. Los Mangos, Ciudad Madero, Tamaulipas, 89440, México

\*bportalesm@ipn.mx and \*alemuss@ipn.mx

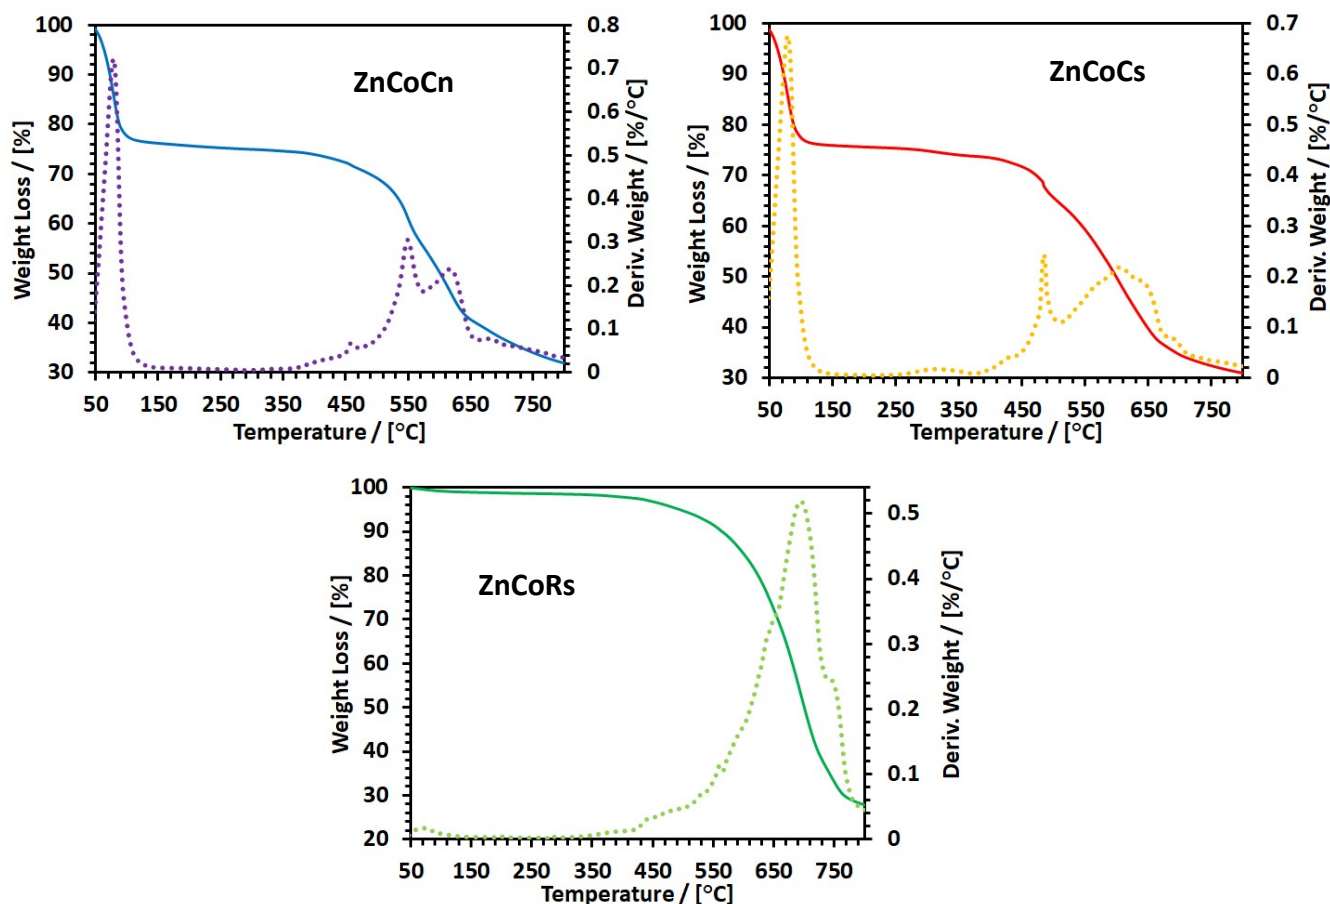

Figure S1. Thermogravimetric performance of 3 materials.

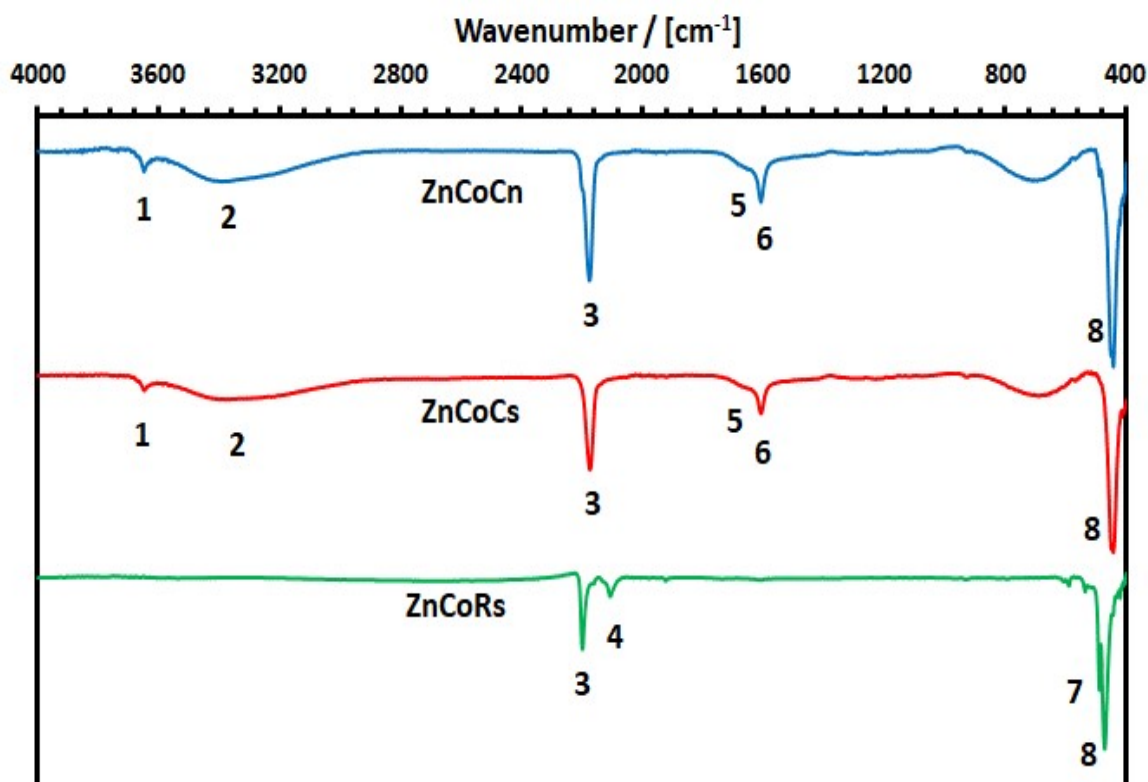

**Figure S2.** Infrared spectra of a) Cubic (F-43m)  $\text{Zn}_3[\text{Co}(\text{CN})_6]_2 \cdot 12\text{H}_2\text{O}$ ; b) cubic stabilized (Pm-3m)  $\text{Zn}_{2.7}\text{Cd}_{0.3}[\text{Co}(\text{CN})_6]_2 \cdot 12\text{H}_2\text{O}$ ; c) Rhombohedral stabilized (R-3c)  $\text{Zn}_3[\text{Fe}_{0.1}\text{Co}_{0.9}(\text{CN})_6]_2$ .

The band in  $3,650\text{ cm}^{-1}$  (**1**) is due to the asymmetric vibration of water molecules that are coordinated to Zn atoms; the wide band from  $3,570$  to  $2,900\text{ cm}^{-1}$  (**2**) originates from the combination of asymmetric and symmetric vibrations of the hydrogen bridged water molecules; the band in  $2,175\text{ cm}^{-1}$  (**3**) is the stretching vibration of triple bonded carbon to nitrogen in the cyanide block  $[\text{Co}(\text{CN})_6]^{-3}$ ; the band in  $2,106\text{ cm}^{-1}$  (**4**) is stretching vibration of CN in  $[\text{Fe}(\text{CN})_6]$ ; the band forming a shoulder in  $1,675\text{ cm}^{-1}$  (**5**) is for the bending vibration of the hydrogen bridged water molecules; the band in  $1,609\text{ cm}^{-1}$  (**6**) is for the bending vibration of water molecules that are coordinated to Zn atoms; the band in  $488\text{ cm}^{-1}$  (**7**) is due to the bending vibration of  $\text{Fe}-\text{C}\equiv\text{N}$ - atoms; the band in  $471\text{ cm}^{-1}$  (**8**) is for the bending vibration of  $\text{Co}-\text{C}\equiv\text{N}$ - chain.

**Table S1.** Crystallographic Parameter of catalysts

|                                 | <b>ZnCoCn</b> | <b>ZnCoCs</b> | <b>ZnCoRs</b> |
|---------------------------------|---------------|---------------|---------------|
| <b>Geometry</b>                 | Cubic         | Cubic         | Rhombohedral  |
| <b>space group</b>              | F -4 3 m      | P m -3 m      | R -3 c        |
| <b>H<sub>2</sub>O molecules</b> | 12            | 12            | 0             |
| <b>a [Å]</b>                    | 10.252        | 10.287        | 12.478        |
| <b>b [Å]</b>                    | 10.252        | 10.287        | 12.478        |
| <b>c [Å]</b>                    | 10.252        | 10.287        | 32.738        |
| <b>External* Vacancy [%]</b>    | 26.37         | 25            | 0             |
| <b>Internal Vacancy [%]</b>     | 50.56         | 49.56         | 0             |
| <b>Size (Å)</b>                 | 1128.68       | 740.23        | 1778.51       |
| <b>Strain (%%)</b>              | 6.87          | 34.28         | 1.94          |

\*Zn or Cd; ‘Co or Fe

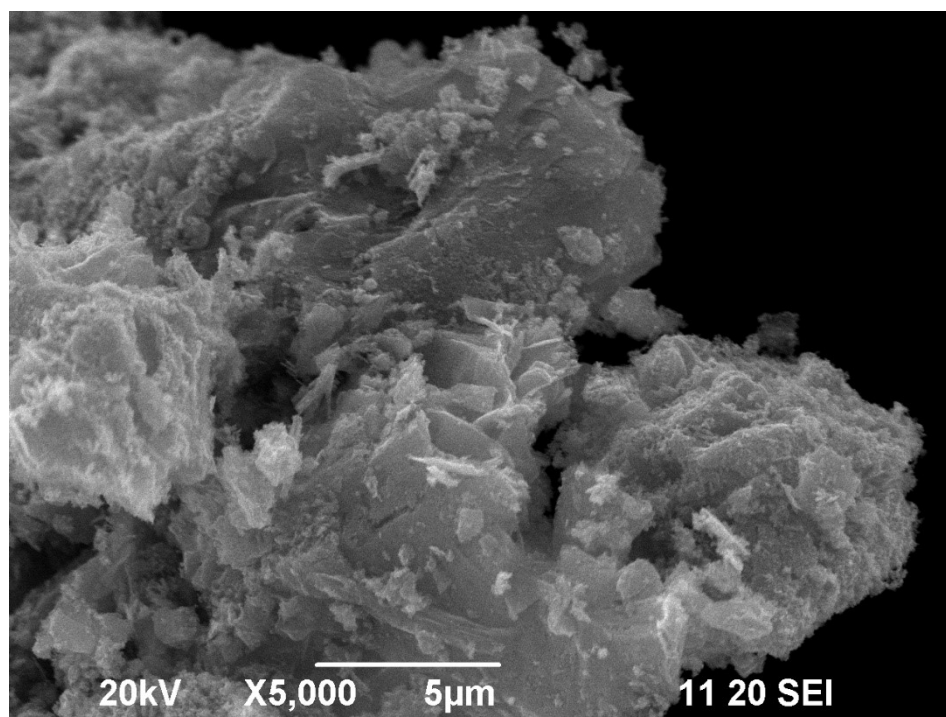

**Figure S3.** SEM image of zinc hexacyanocobaltate (III) (ZnCoCn), there is a big particle with the smallest ones above.

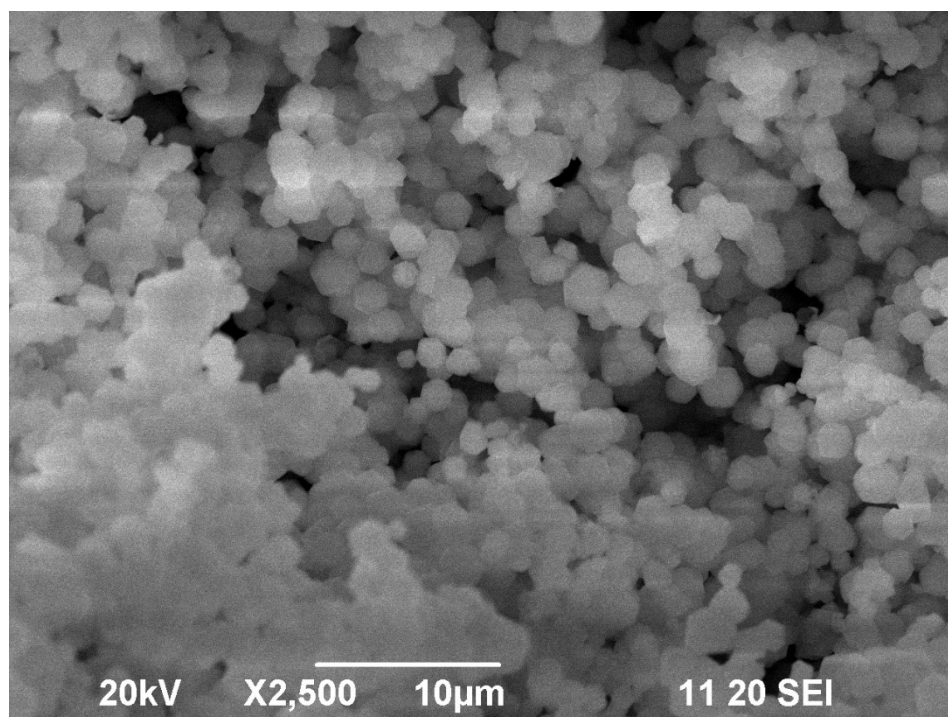

**Figure S4.** SEM image of zinc-cadmium hexacyanocobaltate (III) (ZnCoCs).

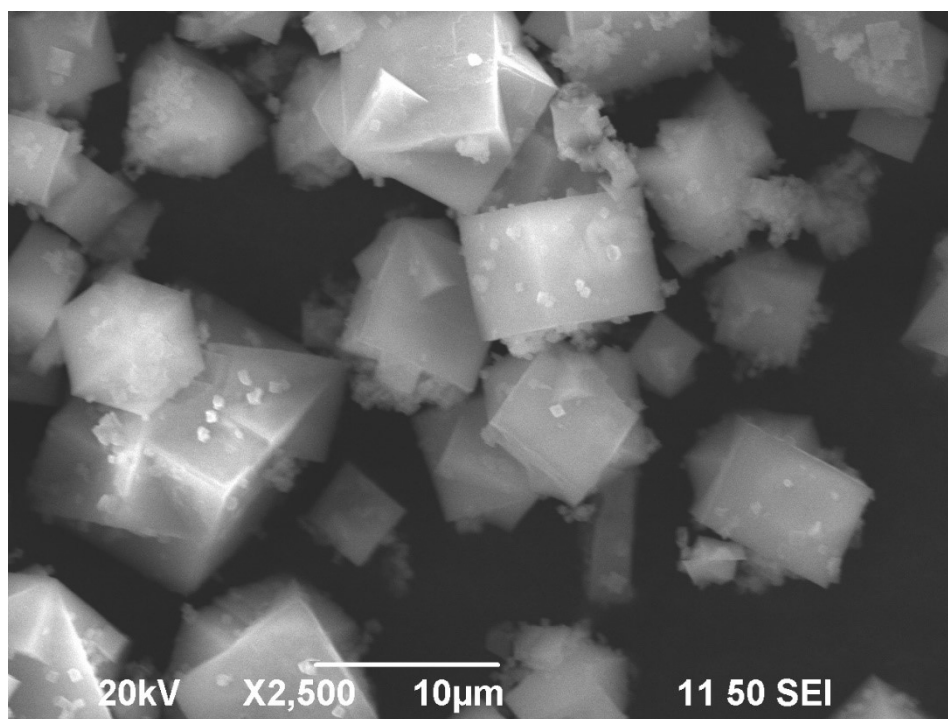

**Figure S5.** SEM image of zinc hexacyanocobaltate with iron replacement (III) (ZnCoRs).

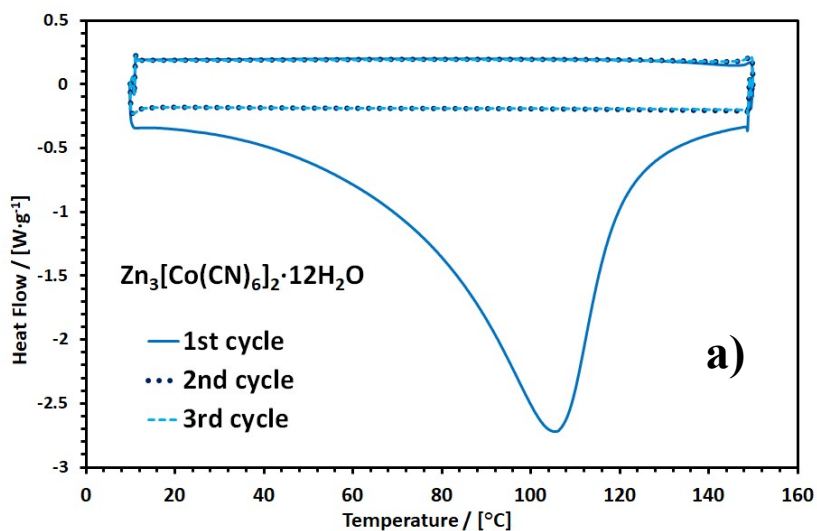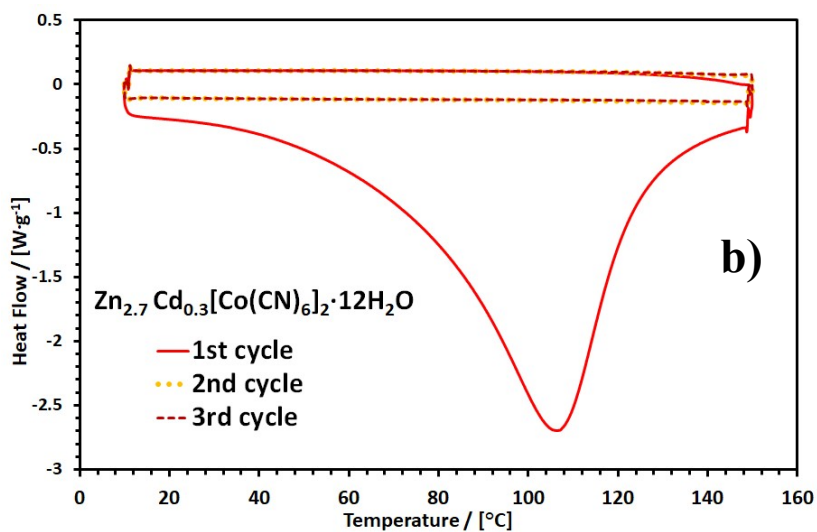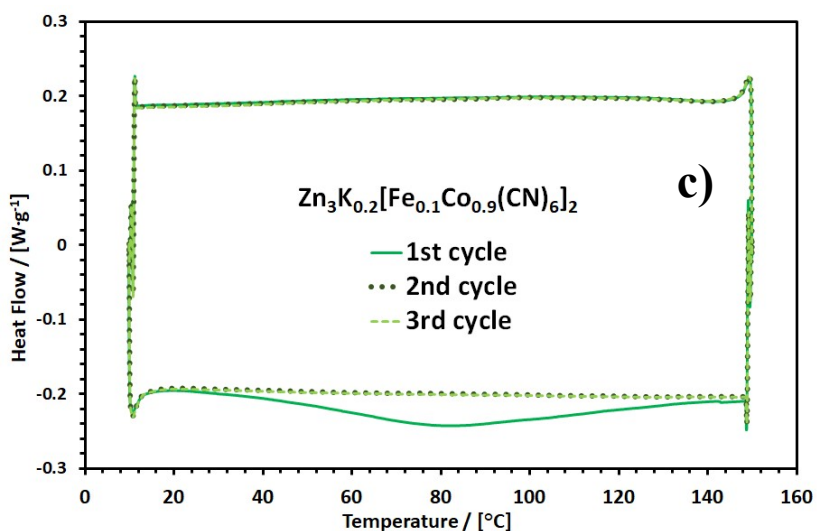

**Figure S6.** 3-cycle DSC Termogram of catalysts: **a)** ZnCoCn (1<sup>st</sup> cycle) and ZnCoRn (2<sup>nd</sup> and 3<sup>rd</sup> cycle); **b)** ZnCoCs; **c)** ZnCoRs.

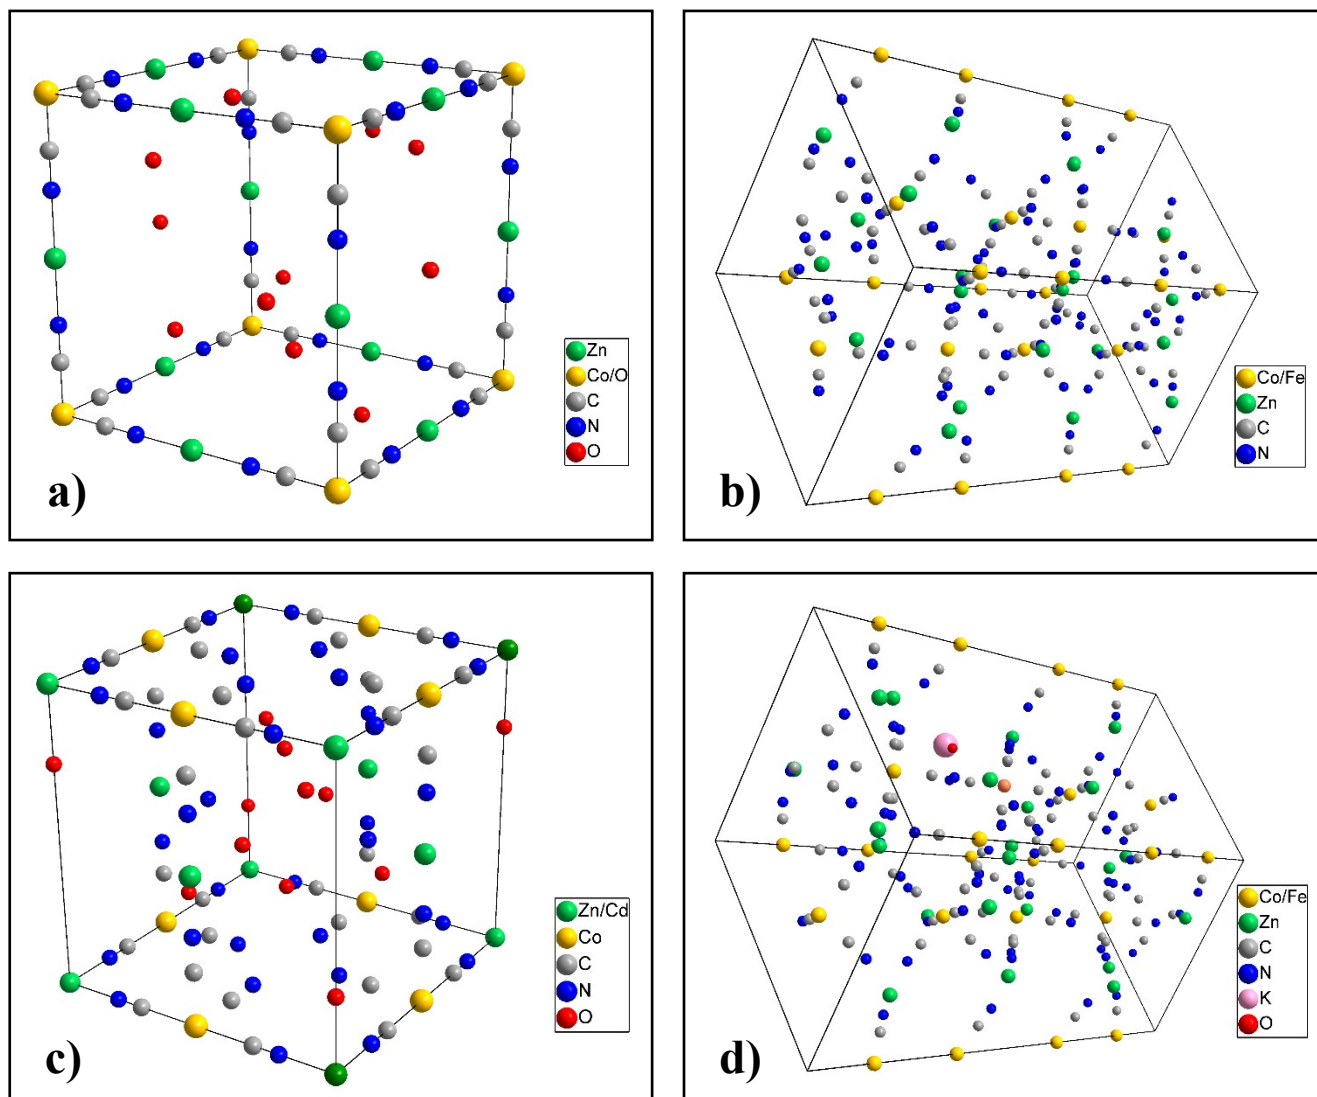

**Figure S7.** Unity Cell image of zinc hexacyanocobaltates; a) Cubic  $F\bar{4}3m$   $Zn_3[Co(CN)_6]_2 \cdot 12H_2O$ , the red balls are the distinct water molecules; b) Rhombohedral  $R\bar{3}c$ ; c) cubic  $Pm\bar{3}m$  stabilized, the darker cyan balls are cadmium atom and red balls the water; d) Rhombohedral  $R\bar{3}c$  stabilized, the orange balls are the internal iron, the green one is the potassium as compensation cation and red are the water associated.



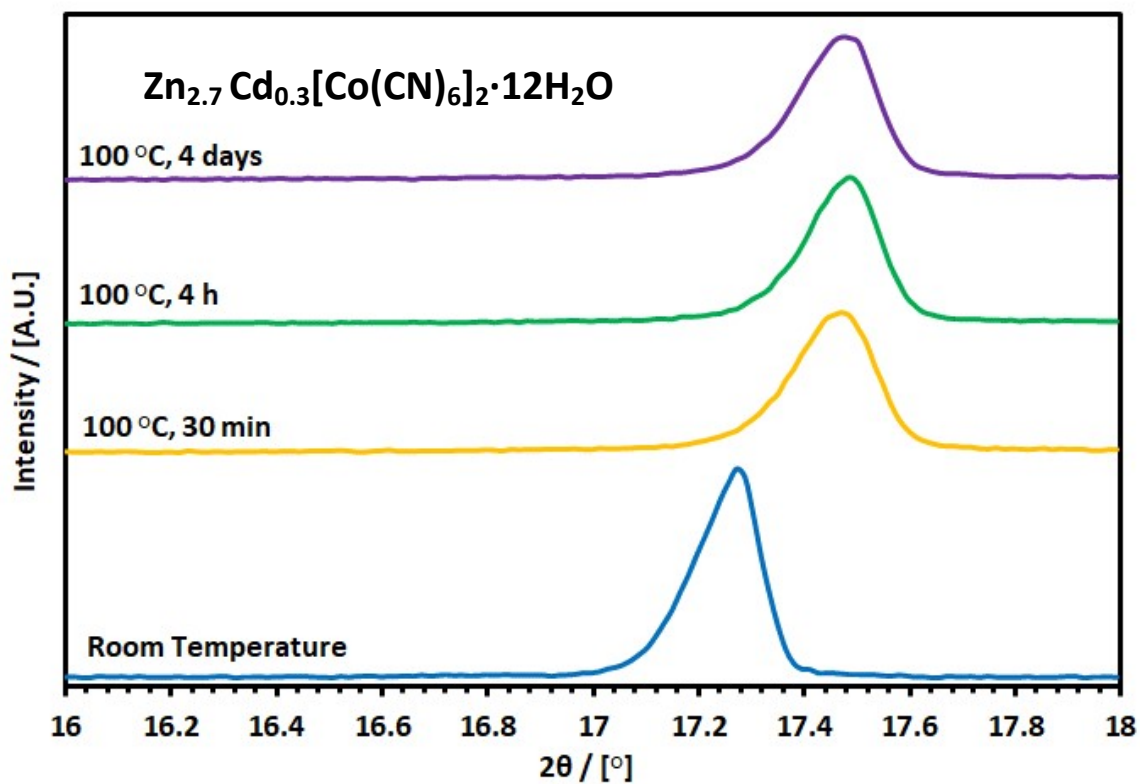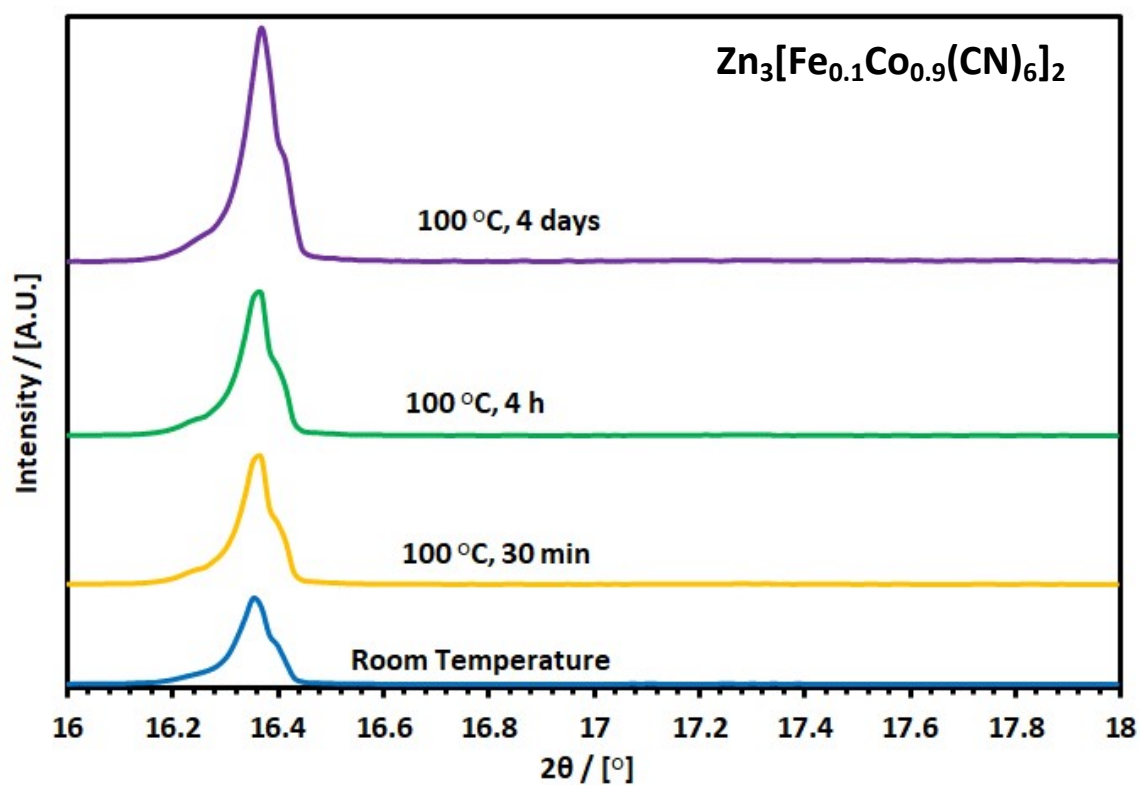

**Figure S8.** Thermal treatment at different times to water extraction in stabilized materials.



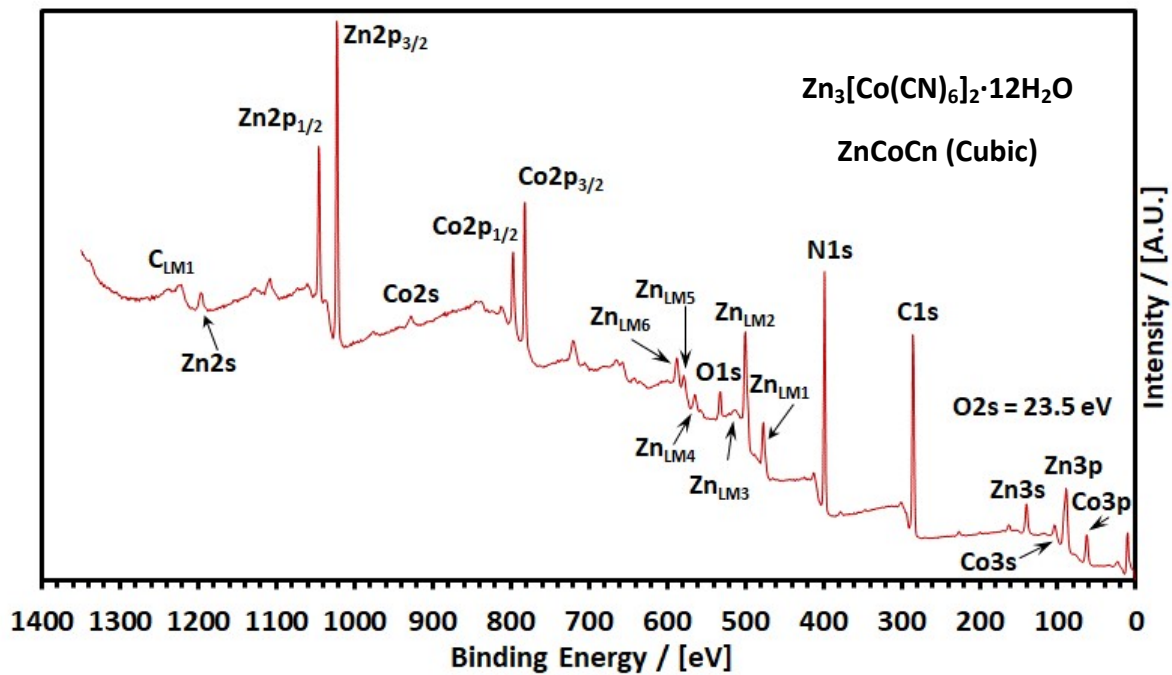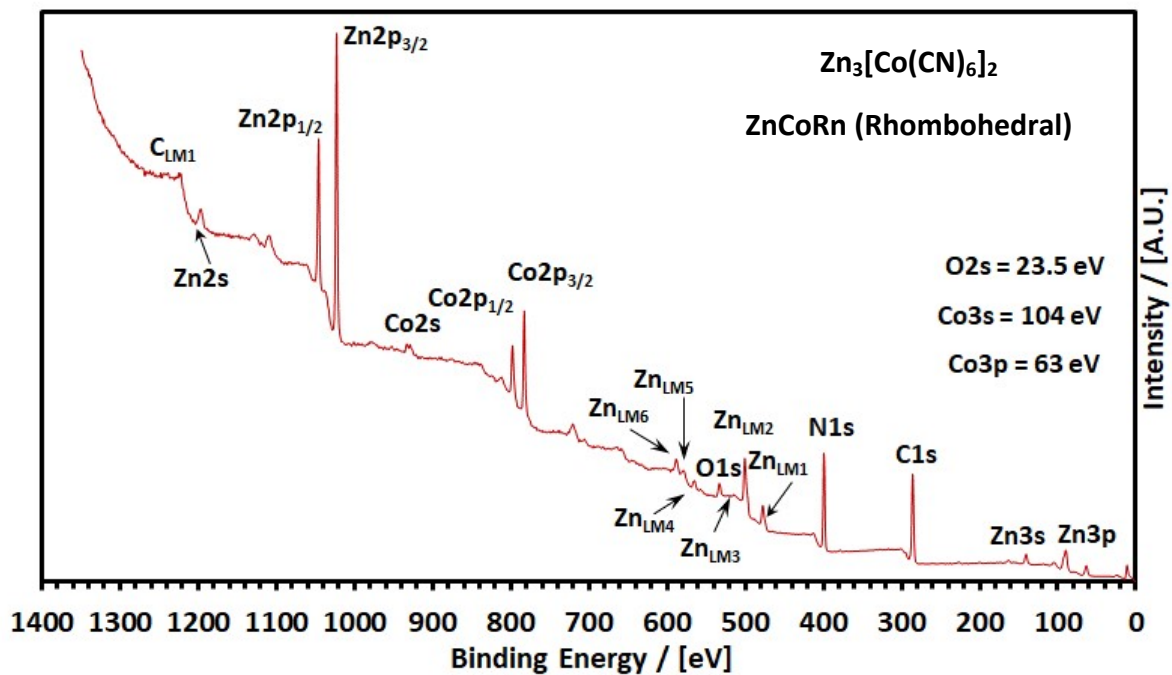

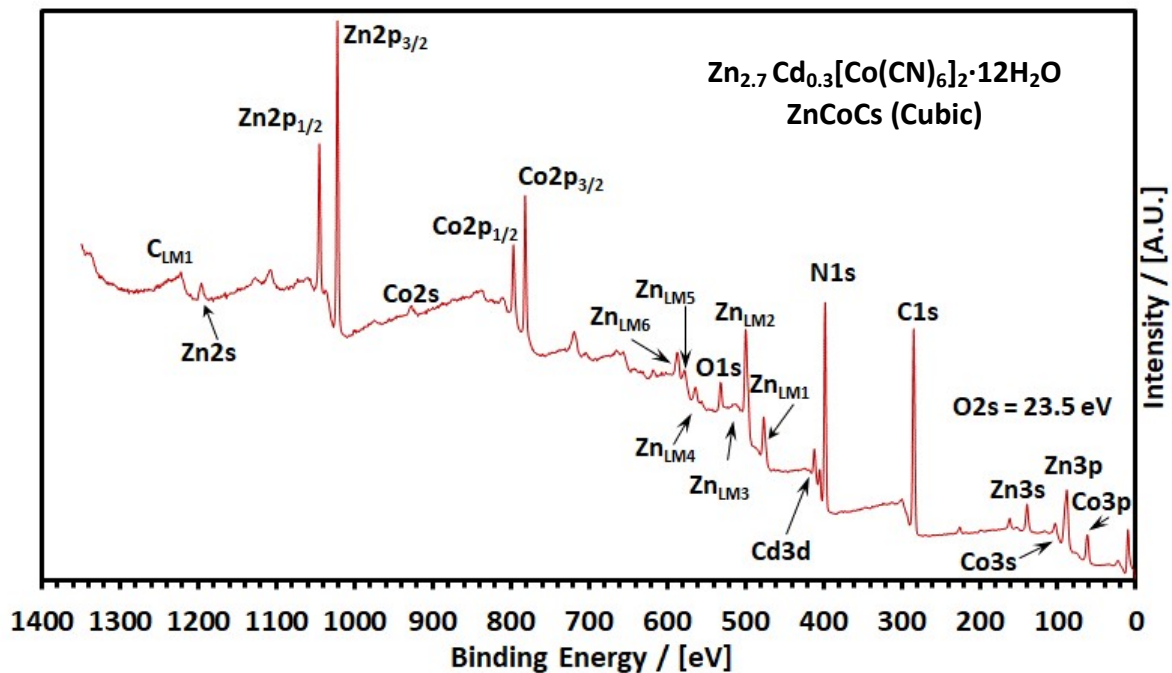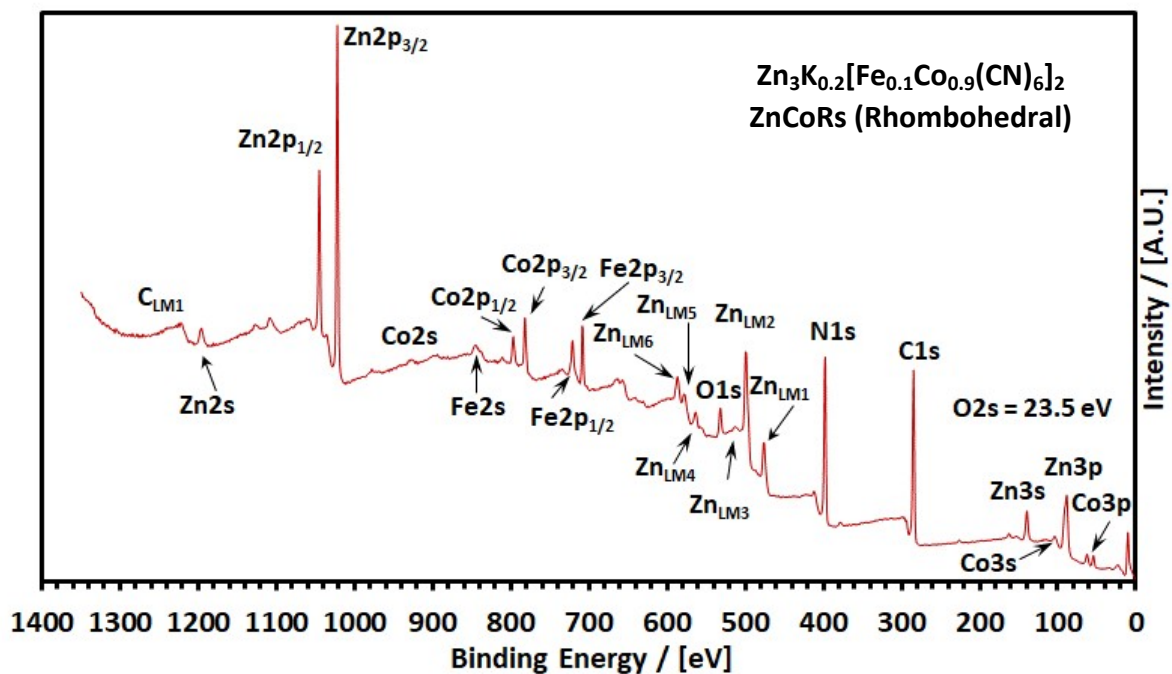

**Figure S9.** XPS survey spectra of all materials.

**Table S2.** C 1s, N 1s, Co 2p, and Zn 2p BE (eV) and Zn Auger (kinetic energy in eV) and Auger modified parameter of the catalysts.

|               | <b>C</b><br><b>1s<sub>CN</sub></b> | <b>N</b><br><b>1s<sub>Zn-N</sub></b> | <b>Co</b><br><b>2p<sub>3/2</sub></b> | <b>Zn</b><br><b>2p<sub>3/2</sub></b> | <b>Zn</b><br><b>L<sub>3</sub>M<sub>45</sub>M<sub>45</sub></b> | <b><math>\alpha'_{\text{Zn}}</math></b><br><b>[eV]</b> |
|---------------|------------------------------------|--------------------------------------|--------------------------------------|--------------------------------------|---------------------------------------------------------------|--------------------------------------------------------|
| <b>ZnCoCs</b> | 284.39                             | 397.8                                | 781.29                               | 1021.4                               | 987.55                                                        | 2008.95                                                |
| <b>ZnCoCn</b> | 284.41                             | 397.66                               | 781.15                               | 1021.29                              | 987.6                                                         | 2008.89                                                |
| <b>ZnCoRn</b> | 284.42                             | 397.7                                | 781.32                               | 1021.33                              | 987.7                                                         | 2009.03                                                |
| <b>ZnCoRs</b> | 284.37                             | 397.4                                | 782.19                               | 1021.75                              | 987.6                                                         | 2009.35                                                |

Because auger peaks have well-defined positions and shapes (see Figure S9 in supporting information), the zinc auger line L<sub>3</sub>M<sub>45</sub>M<sub>45</sub> was measured (Table S2), due to Zn<sup>0</sup> and ZnO having a narrow binding energy difference (0.65 eV) <sup>53</sup>.

Taking the cubic phase (ZnCoCn) as a reference, the rhombohedral phase shows an +0.1 eV shift, in agreement with Zn 2p<sub>3/2</sub> results, the cubic stabilized presented a negligible decrease of 0.05 eV and the rhombohedral stabilized has no change. Hence, the modified Auger parameter ( $\alpha'$ ) <sup>48,56,57</sup> was calculated to find a better way to determine the Zn chemical environment, as compared above, taking the cubic phase (ZnCoCn) as a reference with 2008.89 eV (calculated), the rhombohedral phase has a +0.14 eV shift, according with the previous discussed, due to the positive charge accumulation in Zn atom by the change to tetrahedral coordination and water molecules loss. The cubic stabilized showed a +0.06 eV shift, opposite of what was found in the auger peak, but keeping in mind that the modified auger parameter is a combination of the kinetic energy of L<sub>3</sub>M<sub>45</sub>M<sub>45</sub> Auger line and 2p<sub>3/2</sub> peak, the net effect for chemical environment analysis is sensed <sup>48,56,57</sup>, becoming the best option because has no charge effect interference, for this reason, the  $\alpha'$  was chosen for the final Zn analysis, the result may be attributed to the cadmium atoms that replace zinc in 9:1 proportion as was determined by XRD (see Figure S7-c), a unit cell) and the rhombohedral stabilized phase presented a +0.46 shift, due to the iron substitution as an internal metal, as discussed before, iron is slightly less electronegative than cobalt, then the  $\pi$ -back bonding charge donation effect has more positive charge accumulation in zinc atoms.

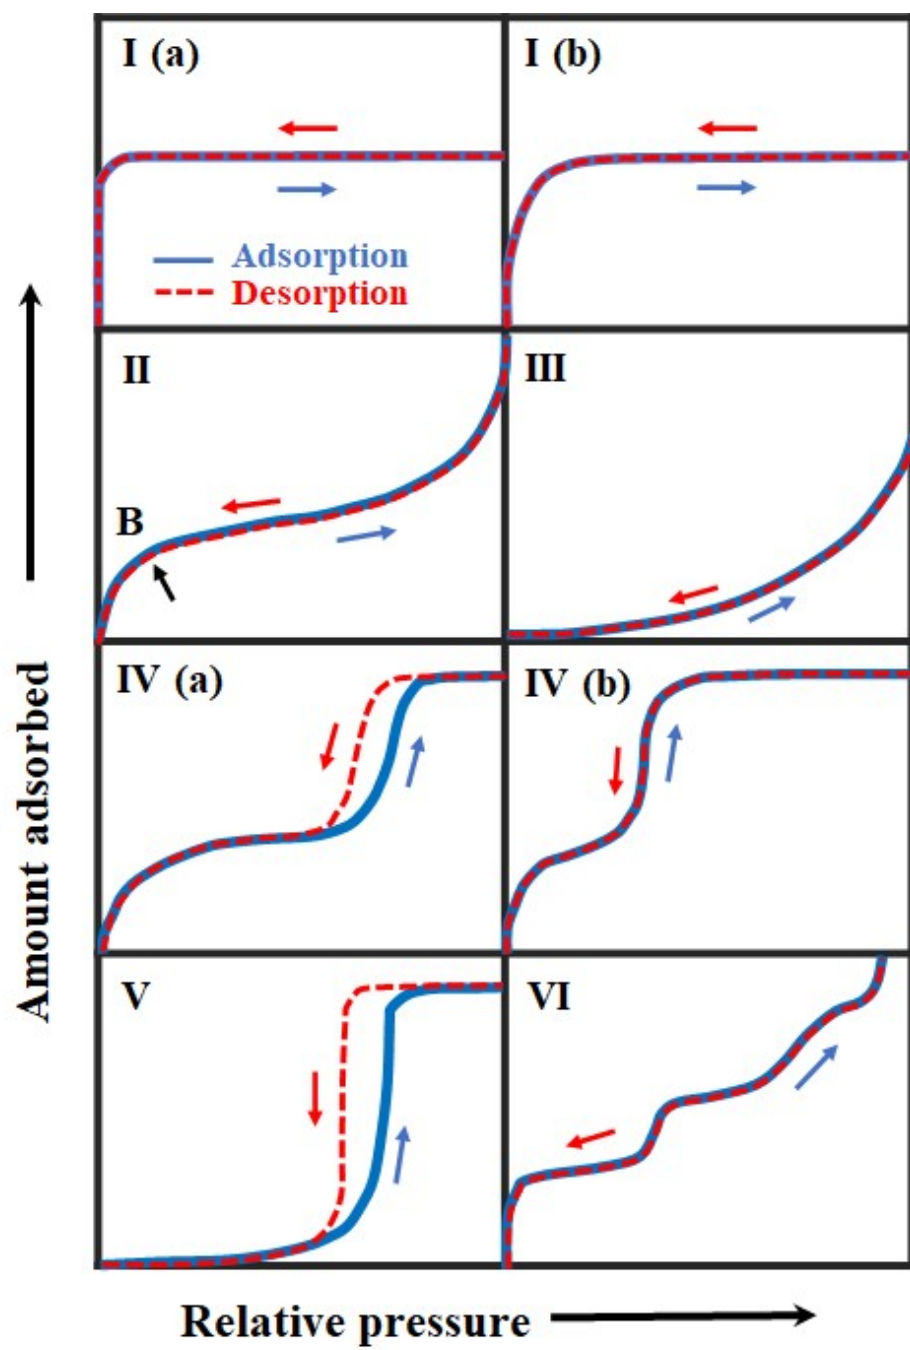

**Figure S10.** IUPAC isotherm classification [58].

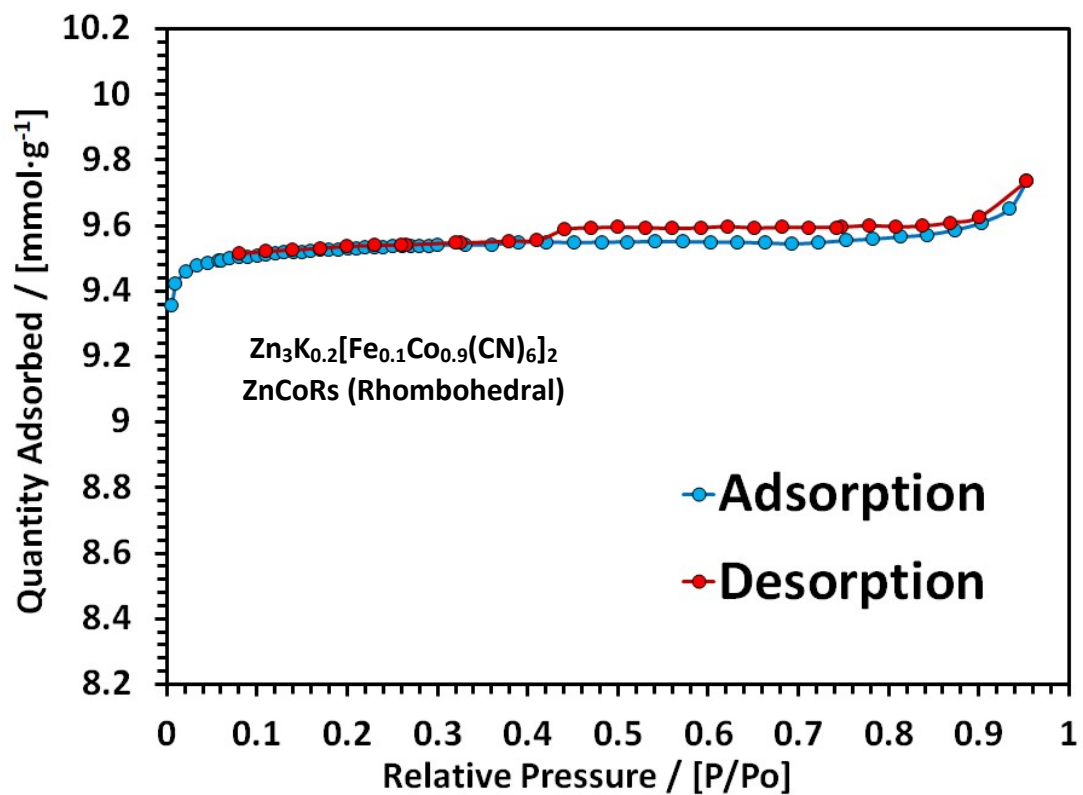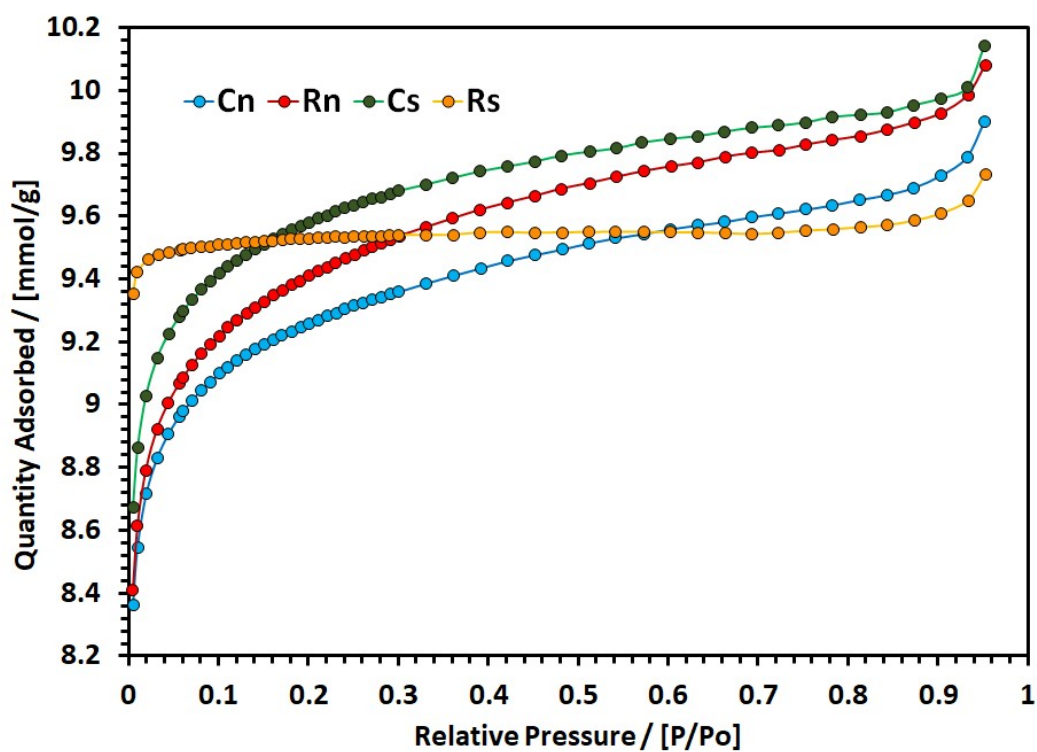

Figure S11. ZnCoRs Isotherm comparison with other materials.

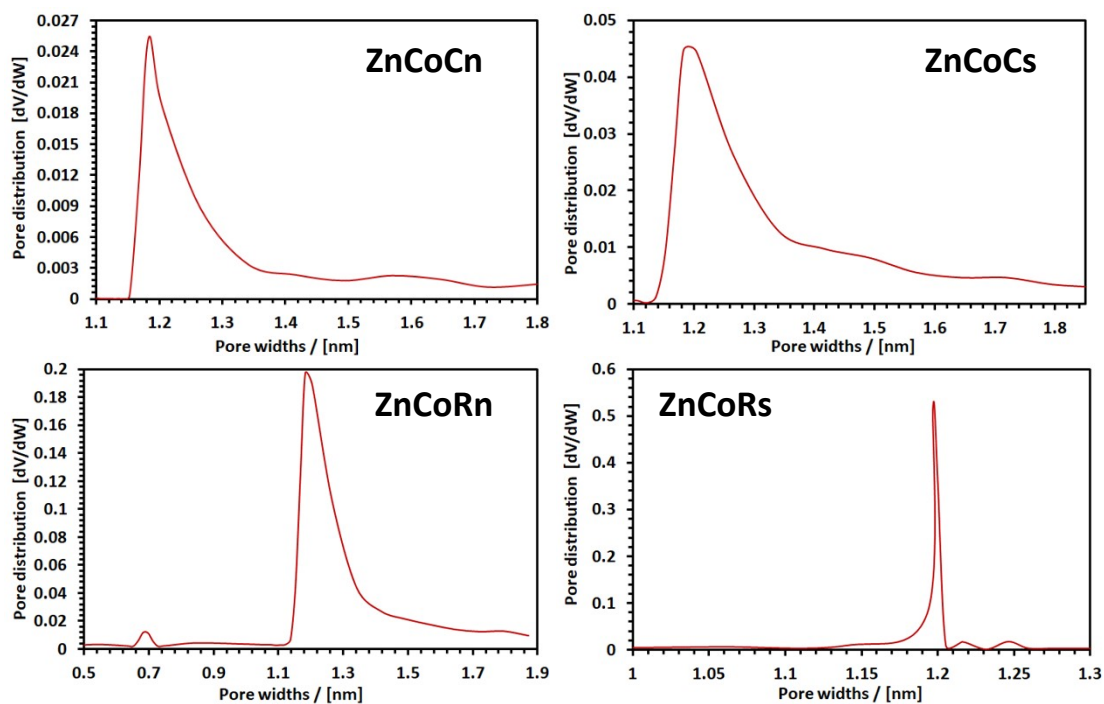

**Figure S12.** Micropore Size Distribution calculated by the DFT method.

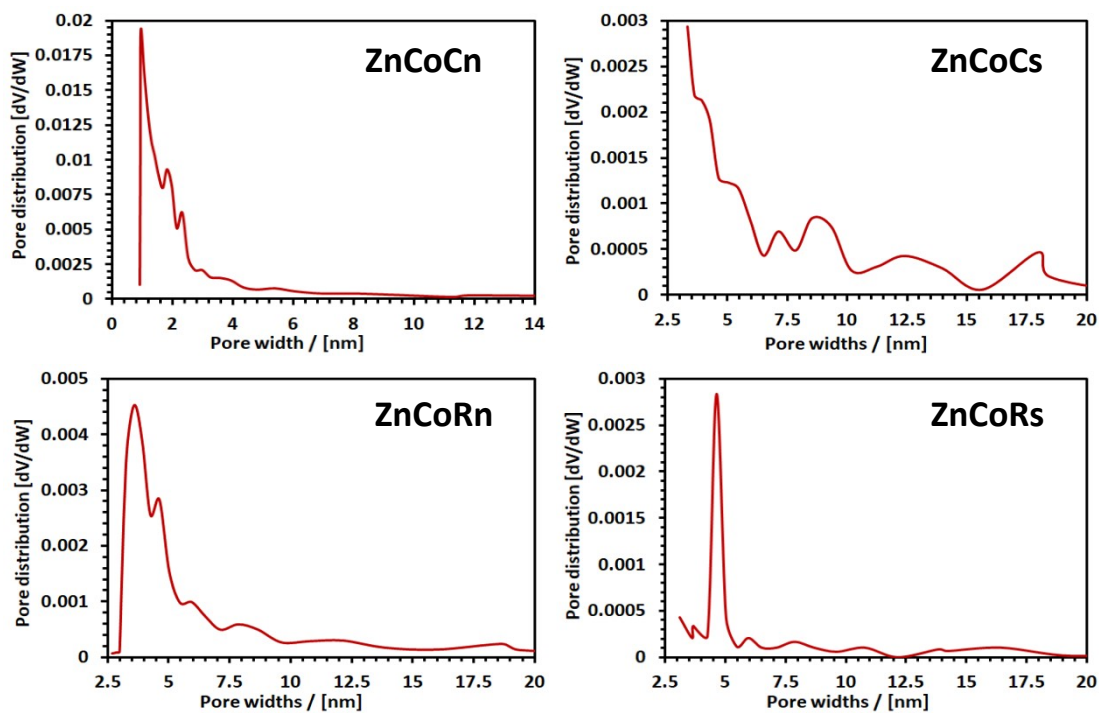

**Figure S13.** Mesopore Size Distribution calculated by BJH method.

**Table S3.** Textural properties of all studied materials

|                                                           | ZnCoCn | ZnCoRn | ZnCoCs | ZnCoRs |
|-----------------------------------------------------------|--------|--------|--------|--------|
| BET Surface Area ( $\text{m}^2\cdot\text{g}^{-1}$ )       | 624.86 | 636.94 | 646.28 | 634.52 |
| t-Plot Micropore Area ( $\text{m}^2\cdot\text{g}^{-1}$ )  | 552.8  | 550.52 | 574.1  | 625.79 |
| t-Plot External Area ( $\text{m}^2\cdot\text{g}^{-1}$ )   | 72.05  | 86.43  | 72.18  | 8.73   |
| Pore Volume ( $\text{cm}^3\cdot\text{g}^{-1}$ )           | 0.343  | 0.349  | 0.351  | 0.337  |
| t-Plot micropore vol. ( $\text{cm}^3\cdot\text{g}^{-1}$ ) | 0.289  | 0.288  | 0.3    | 0.326  |
| Micropore Size by DFT ( $\text{\AA}$ )                    | 11.82  | 11.82  | 12.04  | 11.96  |
| Mesopore Size by BJH ( $\text{\AA}$ )                     | 26.082 | 25.662 | 24.999 | 32.117 |

 **$^1\text{H}$  NMR characterization**



The spectra were recorded with a Bruker Ascend 750 MHz spectrometer with a relaxation time of 10 s and a 2 mM hexamethyldisilane (HMDS), in the NMR laboratory of the Centro de Nanociencias y Micro y Nanotecnologías (CNMN) of the Instituto Politécnico Nacional.

**Table S4.  $^1\text{H}$  NMR signals of the mixture obtained for ZnCoCn in 2 h reaction.**

| Chemical shift (ppm) | Type           | Molecular group        | Proton                                            | Compound             |
|----------------------|----------------|------------------------|---------------------------------------------------|----------------------|
| 0.04                 | Singlet        | $\text{CH}_3$          | $-\text{Si}-\text{CH}_3$                          | HMDS                 |
| 1.01                 | Triplet        | $\text{CH}_3$          | $-\text{CH}_2-\text{CH}_3$                        | TBAB                 |
| 1.46                 | Sextuplet      | $\text{CH}_2$          | $-\text{CH}_2-\text{CH}_2-\text{CH}_3$            | TBAB                 |
| 1.68                 | Quintuplet     | $\text{CH}_2$          | $-\text{CH}_2-\text{CH}_2-\text{CH}_2-$           | TBAB                 |
| 2.8                  | Double doublet | $\text{CH}_2$          | $-\text{CH}-\text{CH}_2-\text{O}-$                | Styrene oxide        |
| 3.15                 | Double doublet | $\text{CH}_2$          | $-\text{CH}-\text{CH}_2-\text{O}-$                | Styrene oxide        |
| 3.38                 | Triplet        | $\text{CH}_2$          | $-\text{N}^+-\text{CH}_2-\text{CH}_2-$            | TBAB                 |
| 3.67                 | Double doublet | $\text{CH}_2$          | $-\text{CH}-\text{CH}_2-\text{OH}$                | Alcohol              |
| 3.76                 | Double doublet | OH                     | $-\text{CH}_2-\text{OH}$ ; $-\text{CH}-\text{OH}$ | Alcohol              |
| 3.86                 | Triplet        | CH                     | $-\text{O}-\text{CH}-\text{CH}_2-$                | Styrene oxide        |
| 4.24                 | Double doublet | $\text{CH}_2$          | $-\text{CH}_2-\text{CH}-$                         | Polycarbonate        |
| 4.34                 | Double doublet | $\text{CH}_2$          | $-\text{CH}-\text{CH}_2-\text{O}-$                | Styrene carbonate    |
| 4.44                 | Double doublet | $\text{CH}_2$          | $-\text{CH}_2-\text{CH}-$                         | Polycarbonate        |
| 4.69                 | Double doublet | $\text{CH}_2$          | $-\text{CH}_2-\text{CH}-$                         | Copolymer            |
| 4.8                  | Double doublet | $\text{CH}_2$          | $-\text{CH}-\text{CH}_2-\text{O}-$                | Styrene carbonate    |
| 4.83                 | Triplet        | CH                     | $-\text{CH}_2-\text{CH}-\text{OH}$                | Alcohol              |
| 4.9                  | Double doublet | $\text{CH}_2$          | $-\text{CH}_2-\text{CH}-$                         | Copolymer            |
| 5.57                 | Triplet        | CH                     | $-\text{CH}_2-\text{CH}-$                         | Copolymer            |
| 5.67                 | Triplet        | CH                     | $-\text{O}-\text{CH}-\text{CH}_2-$                | Styrene carbonate    |
| 5.77                 | Triplet        | CH                     | $-\text{CH}_2-\text{CH}-$                         | Polycarbonate        |
| 6.70-8.20            | -              | $\text{C}_6\text{H}_5$ | $\text{C}_6\text{H}_5-$                           | Reagent and products |

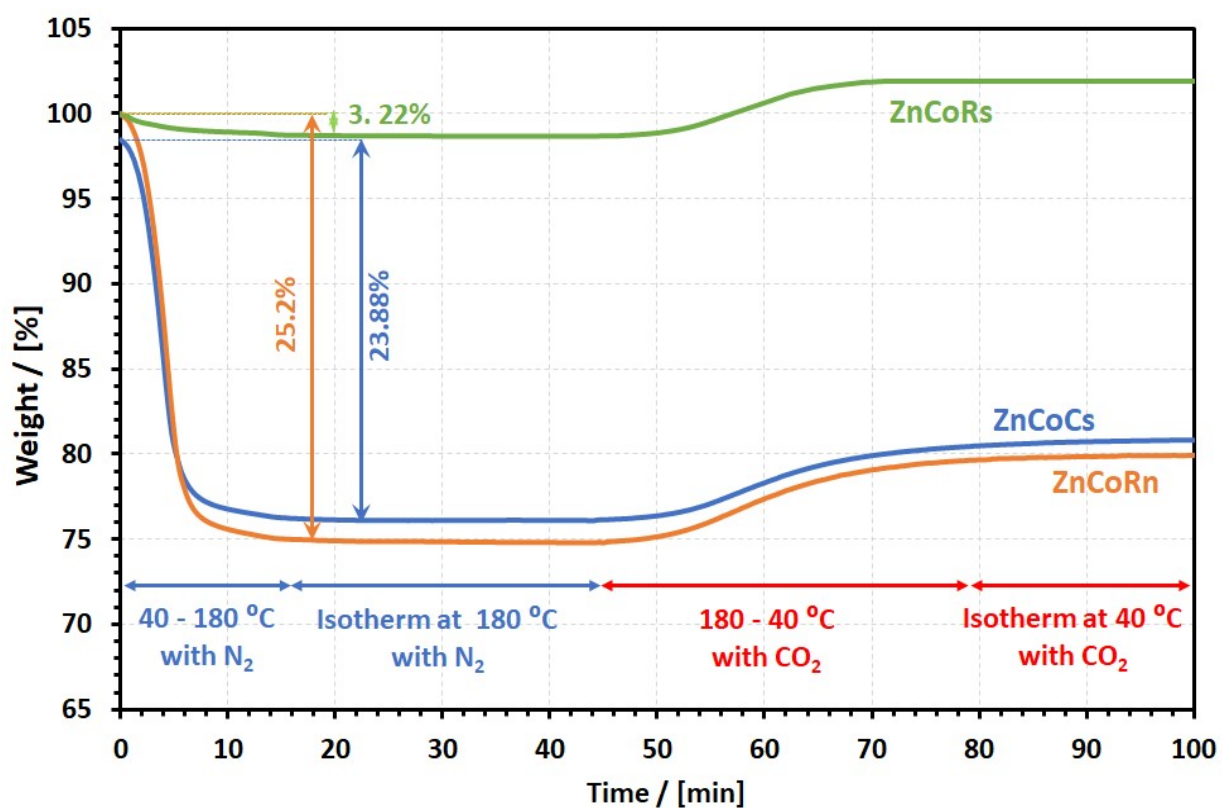

**Figure S14.** TGA experiment with 25 ml·min<sup>-1</sup> of CO<sub>2</sub> flow.

The experiment was carried out first with 25 ml·min<sup>-1</sup> of N<sub>2</sub> flow and an isothermal range was performed, to probe if any interaction may occur, then, the flow was changed to CO<sub>2</sub>. And lets the temperature down to 40 °C by the thermal equilibrium.

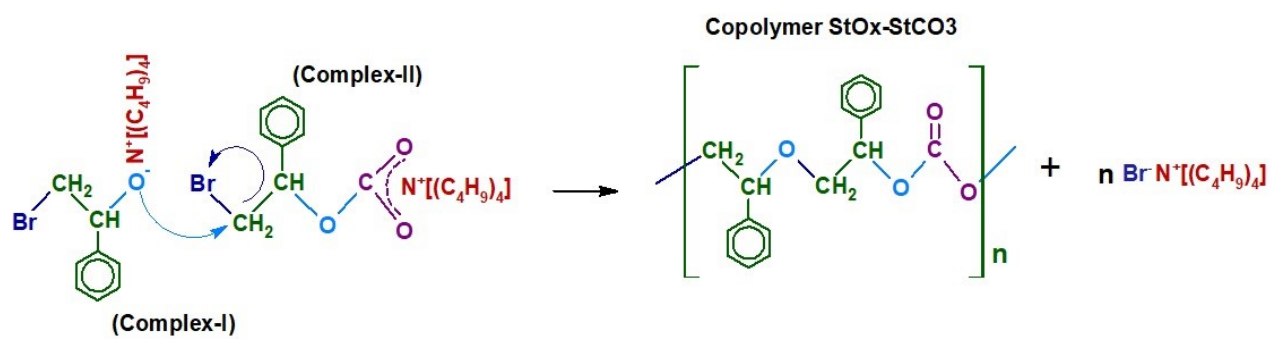

Figure S15. Copolymer formation.

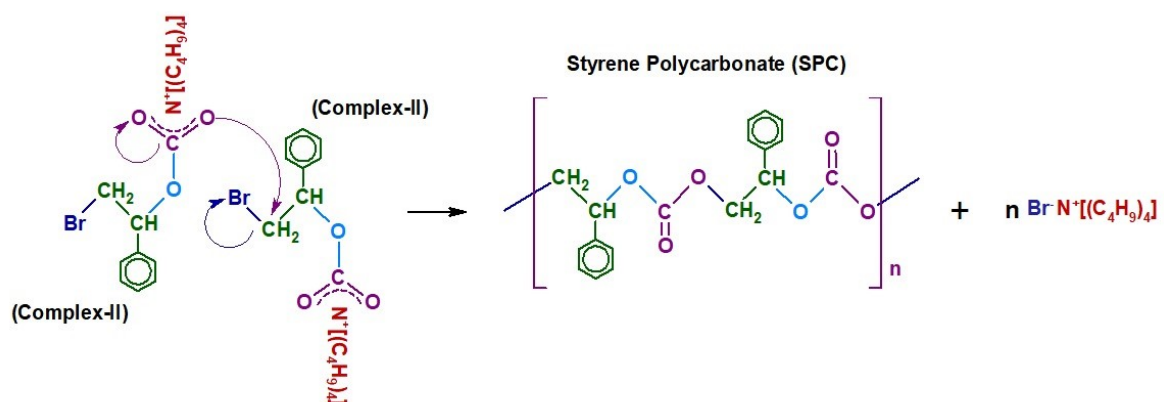

Figure S16. Styrene Polycarbonate formation.

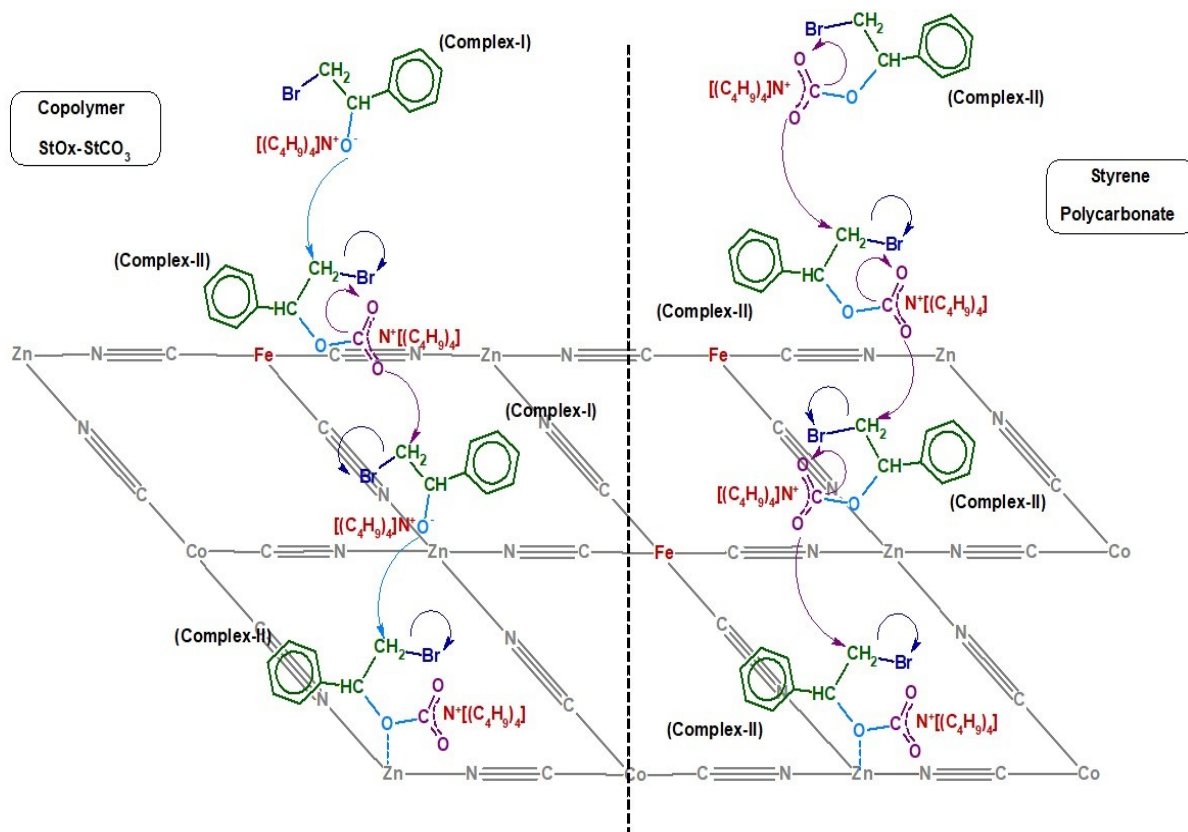

**Figure S17.** Copolymer and Styrene Polycarbonate formation on ZnCoRs surface.
